# Supplementary material for: Ruminal metagenomic analyses of goat data reveals potential functional microbiota by supplementation with essential oil-cobalt complexes
Source: PubMed Central journal article supplement (PMC6362596; doi:10.1186/s12866-019-1400-3), 2019-02-04
Supplement: 12866_2019_1400_MOESM1_ESM.pdf [file 12866_2019_1400_MOESM1_ESM.pdf]

## Supplementary Material :

### **Ruminal metagenomic analyses of goat data reveals potential functional microbiota by supplementation with essential oil-cobalt complexes**

Zhaomin Lei<sup>1</sup>, Ke Zhang<sup>2</sup>, Chao Li<sup>2</sup>, Ting Jiao<sup>3</sup>, Jianping Wu<sup>4</sup>, Yubing Wei<sup>5</sup>, Kechuan Tian<sup>6</sup>, Chong Li<sup>1</sup>, Defu Tang<sup>1</sup>, Delmer I Davis<sup>7</sup>, David P Casper<sup>8</sup>, Hui Jiang<sup>1</sup>, Xiaolong Wang<sup>2</sup>, Jianfu Wang<sup>1\*</sup>

<sup>1</sup>College of Animal Science and Technology, Gansu Agriculture University, Lanzhou, 730070, China.

<sup>2</sup>College of Animal Science and Technology, Northwest A&F University, Yangling, 712100, China.

<sup>3</sup>College of Pratacultural Science, Gansu Agriculture University, Lanzhou, 730070, China.

<sup>4</sup>Gansu Academy of Agriculture Sciences, Lanzhou, 730070, China.

<sup>5</sup>The Animal Husbandry and Veterinary Station of Ganzhou County, Zhangye, 734000, China.

<sup>6</sup>Institute of Animal Science, Xinjiang Academy of Animal Science, Urumqi, 830011, China.

<sup>7</sup>Ralco Nutrition Inc., Marshall, MN, 56258, USA.

<sup>8</sup>Furst-McNess Company, Freeport, IL 61032 USA.

\*Correspondence: [wangjf@gsau.edu.cn](mailto:wangjf@gsau.edu.cn)

**Running title:** Functional microbiota by supplementation with essential oil-cobalt complexes

**E-mails:** Zhaomin Lei: [leizm@gsau.edu.cn](mailto:leizm@gsau.edu.cn)

Ke Zhang: [kezhangdk@163.com](mailto:kezhangdk@163.com)

Chao Li: [lichao\\_xinong@163.com](mailto:lichao_xinong@163.com)

Ting Jiao: [Jiaoting207@126.com](mailto:Jiaoting207@126.com)

Jianping Wu: [wujp@gsagr.ac.cn](mailto:wujp@gsagr.ac.cn)

Yubing Wei: [Weiyb258@163.com](mailto:Weiyb258@163.com)

Kechuan Tian: [tiankechuan@163.com](mailto:tiankechuan@163.com)

Chong Li: [lichong@gsau.edu.cn](mailto:lichong@gsau.edu.cn)

Defu Tang: [tangdf@gsau.edu.cn](mailto:tangdf@gsau.edu.cn)

Delmer I Davis: [del.davis@ralcnutrition.com](mailto:del.davis@ralcnutrition.com)

David P Casper: [david.casper@mcness.com](mailto:david.casper@mcness.com)

Hui Jiang: [1353090083@qq.com](mailto:1353090083@qq.com)

Xiaolong Wang: [xiaolongwang@nwafu.edu.cn](mailto:xiaolongwang@nwafu.edu.cn)

Jianfu Wang: [wangjf@gsau.edu.cn](mailto:wangjf@gsau.edu.cn)

**Supplementary table 1.** Description of the assembly data from the 9 samples

|                         | Mean $\pm$ SD        | Sum       |
|-------------------------|----------------------|-----------|
| High quality data       | 11.84 $\pm$ 1.92 Gb  | 107 Gb    |
| Assembled scatis length | 80.57 $\pm$ 17.46 Mb | 725.13 Mb |
| N50                     | 2,823 bp             | 25,409 kb |
| ORFs number             | 77,722 $\pm$ 14,026  | 699,497   |

**Supplementary Table S2. Comparison of the phylain rumen bacterial of three treatment group.**

|                         | 0mg    |        |        | 52mg   |        |        | 91mg   |        |        | T-test |        |        |
|-------------------------|--------|--------|--------|--------|--------|--------|--------|--------|--------|--------|--------|--------|
|                         | 0-1    | 0-2    | 0-3    | 52-1   | 52-2   | 52-3   | 91-1   | 91-2   | 91-3   | 0 52   | 0 91   | 52 91  |
| Bacteroidetes           | 0.4081 | 0.2178 | 0.3519 | 0.2979 | 0.2508 | 0.4142 | 0.2640 | 0.2253 | 0.1533 | 0.9497 | 0.1611 | 0.1416 |
| Firmicutes              | 0.1260 | 0.1323 | 0.0363 | 0.0225 | 0.0465 | 0.0630 | 0.0823 | 0.0719 | 0.0385 | 0.1773 | 0.3702 | 0.3166 |
| Proteobacteria          | 0.0206 | 0.0095 | 0.0025 | 0.0172 | 0.0282 | 0.0139 | 0.0432 | 0.0105 | 0.0113 | 0.2614 | 0.4184 | 0.8775 |
| Tenericutes             | 0.0019 | 0.0003 | 0.0001 | 0.0002 | 0.0001 | 0.0001 | 0.0004 | 0.0005 | 0.0005 | 0.3311 | 0.6335 | 0.0018 |
| Spirochaetes            | 0.0018 | 0.0347 | 0.0011 | 0.0003 | 0.0015 | 0.0044 | 0.0085 | 0.0017 | 0.0014 | 0.4022 | 0.4865 | 0.5343 |
| Verrucomicrobia         | 0.0018 | 0.0020 | 0.0004 | 0.0044 | 0.0007 | 0.0018 | 0.0016 | 0.0006 | 0.0033 | 0.5242 | 0.6807 | 0.7678 |
| Actinobacteria_<phylum> | 0.0014 | 0.0011 | 0.0005 | 0.0008 | 0.0006 | 0.0016 | 0.0011 | 0.0010 | 0.0009 | 0.9461 | 0.9949 | 0.9260 |
| Chlamydiae              | 0.0008 | 0.0005 | 0.0002 | 0.0002 | 0.0009 | 0.0018 | 0.0014 | 0.0002 | 0.0005 | 0.4359 | 0.6644 | 0.6937 |
| Fibrobacteres           | 0.0007 | 0.0112 | 0.0011 | 0.0050 | 0.0031 | 0.0007 | 0.0003 | 0.0000 | 0.0002 | 0.7163 | 0.2888 | 0.0889 |
| Cyanobacteria           | 0.0007 | 0.0003 | 0.0002 | 0.0001 | 0.0003 | 0.0008 | 0.0003 | 0.0003 | 0.0004 | 0.9922 | 0.7136 | 0.7233 |
| Chloroflexi             | 0.0006 | 0.0001 | 0.0004 | 0.0001 | 0.0001 | 0.0003 | 0.0001 | 0.0000 | 0.0002 | 0.3033 | 0.1876 | 0.4428 |
| Planctomycetes          | 0.0004 | 0.0005 | 0.0001 | 0.0001 | 0.0001 | 0.0005 | 0.0004 | 0.0001 | 0.0010 | 0.5856 | 0.5514 | 0.3647 |
| Fusobacteria            | 0.0004 | 0.0001 | 0.0001 | 0.0000 | 0.0001 | 0.0003 | 0.0005 | 0.0007 | 0.0002 | 0.7041 | 0.1601 | 0.0903 |
| Parcubacteria           | 0.0003 | 0.0002 | 0.0001 | 0.0000 | 0.0000 | 0.0002 | 0.0003 | 0.0001 | 0.0003 | 0.2889 | 0.6624 | 0.2013 |
| Acidobacteria           | 0.0002 | 0.0000 | 0.0000 | 0.0000 | 0.0000 | 0.0006 | 0.0003 | 0.0002 | 0.0002 | 0.5546 | 0.0475 | 0.7903 |
| Synergistetes           | 0.0001 | 0.0001 | 0.0001 | 0.0000 | 0.0003 | 0.0007 | 0.0002 | 0.0005 | 0.0021 | 0.2471 | 0.2028 | 0.3561 |
| Elusimicrobia           | 0.0000 | 0.0001 | 0.0000 | 0.0000 | 0.0015 | 0.0001 | 0.0002 | 0.0064 | 0.0001 | 0.3700 | 0.3503 | 0.4720 |

**Supplementary Table S3. Comparison of the genera in rumen bacterial of three treatment group.**

| taxa              | 0 mg   |        |        | 52 mg  |        |        | 91 mg  |        |        | T-test |        |        |
|-------------------|--------|--------|--------|--------|--------|--------|--------|--------|--------|--------|--------|--------|
|                   | 0-1    | 0-2    | 0-3    | 52-1   | 52-2   | 52-3   | 91-1   | 91-2   | 91-3   | 0 52   | 0 91   | 52 91  |
| Staphylococcus    | 0.0001 | 0.0001 | 0.0001 | 0.0000 | 0.0000 | 0.0000 | 0.0002 | 0.0000 | 0.0001 | 0.0066 | 0.5772 | 0.1594 |
| Brachyspira       | 0.0000 | 0.0000 | 0.0000 | 0.0001 | 0.0001 | 0.0001 | 0.0002 | 0.0003 | 0.0002 | 0.0162 | 0.0017 | 0.0218 |
| Succinimonas      | 0.0003 | 0.0003 | 0.0000 | 0.0007 | 0.0014 | 0.0009 | 0.0018 | 0.0001 | 0.0003 | 0.0202 | 0.3688 | 0.6734 |
| Desulfosporosinus | 0.0002 | 0.0003 | 0.0002 | 0.0000 | 0.0000 | 0.0001 | 0.0001 | 0.0000 | 0.0000 | 0.0421 | 0.0329 | 0.7809 |
| Pseudobutyrvibrio | 0.0003 | 0.0003 | 0.0002 | 0.0001 | 0.0001 | 0.0002 | 0.0001 | 0.0002 | 0.0000 | 0.0666 | 0.0644 | 0.5252 |
| Lachnoclostridium | 0.0017 | 0.0012 | 0.0010 | 0.0003 | 0.0007 | 0.0010 | 0.0006 | 0.0019 | 0.0005 | 0.0689 | 0.5714 | 0.5380 |
| Anaerotruncus     | 0.0008 | 0.0005 | 0.0002 | 0.0000 | 0.0001 | 0.0001 | 0.0011 | 0.0001 | 0.0002 | 0.0758 | 0.9074 | 0.2770 |
| Acidiphilium      | 0.0003 | 0.0006 | 0.0001 | 0.0000 | 0.0000 | 0.0000 | 0.0014 | 0.0001 | 0.0002 | 0.0880 | 0.6422 | 0.2601 |
| Butyrvibrio       | 0.0041 | 0.0030 | 0.0012 | 0.0005 | 0.0014 | 0.0008 | 0.0014 | 0.0020 | 0.0007 | 0.0982 | 0.2027 | 0.3603 |
| Selenomonas       | 0.0004 | 0.0001 | 0.0002 | 0.0003 | 0.0052 | 0.0073 | 0.0021 | 0.0005 | 0.0006 | 0.1267 | 0.1863 | 0.2135 |
| Megamonas         | 0.0000 | 0.0000 | 0.0000 | 0.0000 | 0.0002 | 0.0003 | 0.0001 | 0.0000 | 0.0000 | 0.1278 | 0.5850 | 0.1460 |
| Megasphaera       | 0.0000 | 0.0001 | 0.0000 | 0.0000 | 0.0003 | 0.0003 | 0.0001 | 0.0003 | 0.0001 | 0.1292 | 0.1899 | 0.7355 |
| Coprococcus       | 0.0006 | 0.0002 | 0.0002 | 0.0001 | 0.0001 | 0.0000 | 0.0001 | 0.0000 | 0.0001 | 0.1392 | 0.1538 | 0.6383 |
| Tolumonas         | 0.0000 | 0.0001 | 0.0000 | 0.0001 | 0.0009 | 0.0004 | 0.0000 | 0.0000 | 0.0000 | 0.1542 | 0.5983 | 0.1324 |
| Clostridium       | 0.0128 | 0.0072 | 0.0026 | 0.0014 | 0.0020 | 0.0036 | 0.0065 | 0.0116 | 0.0032 | 0.1582 | 0.9156 | 0.1324 |
| Mitsuokella       | 0.0003 | 0.0000 | 0.0000 | 0.0002 | 0.0006 | 0.0011 | 0.0005 | 0.0000 | 0.0001 | 0.1635 | 0.6731 | 0.2379 |
| Chryseobacterium  | 0.0000 | 0.0001 | 0.0001 | 0.0001 | 0.0002 | 0.0004 | 0.0001 | 0.0003 | 0.0001 | 0.2151 | 0.1365 | 0.7479 |
| Aeromonas         | 0.0000 | 0.0002 | 0.0000 | 0.0000 | 0.0007 | 0.0005 | 0.0000 | 0.0002 | 0.0000 | 0.2153 | 0.8760 | 0.1903 |
| Pedosphaera       | 0.0000 | 0.0002 | 0.0000 | 0.0000 | 0.0000 | 0.0000 | 0.0002 | 0.0001 | 0.0014 | 0.2170 | 0.2726 | 0.2226 |
| Azospirillum      | 0.0000 | 0.0002 | 0.0001 | 0.0000 | 0.0000 | 0.0000 | 0.0003 | 0.0003 | 0.0006 | 0.2172 | 0.0707 | 0.0239 |
| Ruminobacter      | 0.0000 | 0.0002 | 0.0000 | 0.0087 | 0.0015 | 0.0008 | 0.0190 | 0.0010 | 0.0012 | 0.2281 | 0.3044 | 0.6243 |
| Paenibacillus     | 0.0011 | 0.0005 | 0.0002 | 0.0001 | 0.0004 | 0.0002 | 0.0005 | 0.0002 | 0.0003 | 0.2524 | 0.4323 | 0.2864 |
| Lactobacillus     | 0.0001 | 0.0001 | 0.0002 | 0.0001 | 0.0000 | 0.0001 | 0.0003 | 0.0004 | 0.0001 | 0.2558 | 0.2381 | 0.1177 |
| Peptoclostridium  | 0.0003 | 0.0001 | 0.0001 | 0.0001 | 0.0001 | 0.0001 | 0.0003 | 0.0002 | 0.0003 | 0.2677 | 0.2504 | 0.0057 |
| Streptomyces      | 0.0000 | 0.0000 | 0.0000 | 0.0001 | 0.0001 | 0.0000 | 0.0002 | 0.0000 | 0.0002 | 0.2740 | 0.0814 | 0.2195 |
| Acidaminococcus   | 0.0001 | 0.0009 | 0.0001 | 0.0001 | 0.0001 | 0.0000 | 0.0001 | 0.0000 | 0.0001 | 0.2762 | 0.3168 | 0.5883 |
| Corallococcus     | 0.0000 | 0.0003 | 0.0000 | 0.0000 | 0.0000 | 0.0000 | 0.0001 | 0.0000 | 0.0000 | 0.2769 | 0.5045 | 0.0378 |
| Roseburia         | 0.0003 | 0.0007 | 0.0001 | 0.0000 | 0.0001 | 0.0003 | 0.0003 | 0.0002 | 0.0001 | 0.2933 | 0.4556 | 0.4379 |
| Coprobacillus     | 0.0049 | 0.0006 | 0.0005 | 0.0005 | 0.0000 | 0.0001 | 0.0013 | 0.0033 | 0.0015 | 0.2941 | 0.9882 | 0.0500 |
| Alistipes         | 0.0111 | 0.0082 | 0.0077 | 0.0013 | 0.0043 | 0.0107 | 0.0192 | 0.0099 | 0.0049 | 0.2962 | 0.6157 | 0.3056 |
| Ruminococcus      | 0.0032 | 0.0162 | 0.0009 | 0.0004 | 0.0009 | 0.0018 | 0.0041 | 0.0022 | 0.0012 | 0.2966 | 0.4247 | 0.1971 |
| Ruminiclostridium | 0.0015 | 0.0004 | 0.0002 | 0.0001 | 0.0001 | 0.0004 | 0.0004 | 0.0006 | 0.0003 | 0.3042 | 0.5730 | 0.1332 |
| Coraliomargarita  | 0.0001 | 0.0001 | 0.0001 | 0.0014 | 0.0002 | 0.0001 | 0.0002 | 0.0001 | 0.0003 | 0.3052 | 0.4372 | 0.3558 |
| Fretibacterium    | 0.0000 | 0.0000 | 0.0000 | 0.0000 | 0.0000 | 0.0002 | 0.0001 | 0.0002 | 0.0010 | 0.3059 | 0.2030 | 0.2700 |

|                       |        |        |        |        |        |        |        |        |        |        |        |        |        |
|-----------------------|--------|--------|--------|--------|--------|--------|--------|--------|--------|--------|--------|--------|--------|
| Acholeplasma          | 0.0012 | 0.0001 | 0.0000 | 0.0000 | 0.0000 | 0.0000 | 0.0000 | 0.0003 | 0.0003 | 0.0001 | 0.3101 | 0.5929 | 0.0160 |
| Pedobacter            | 0.0000 | 0.0001 | 0.0000 | 0.0001 | 0.0001 | 0.0003 | 0.0004 | 0.0001 | 0.0003 | 0.0003 | 0.3243 | 0.1188 | 0.3263 |
| Sphaerochaeta         | 0.0003 | 0.0064 | 0.0001 | 0.0000 | 0.0000 | 0.0002 | 0.0001 | 0.0000 | 0.0000 | 0.0000 | 0.3494 | 0.3466 | 0.8345 |
| Paludibacter          | 0.0026 | 0.0014 | 0.0005 | 0.0017 | 0.0001 | 0.0001 | 0.0000 | 0.0015 | 0.0001 | 0.0001 | 0.3509 | 0.2974 | 0.9198 |
| Butyricimonas         | 0.0008 | 0.0002 | 0.0003 | 0.0000 | 0.0003 | 0.0003 | 0.0004 | 0.0004 | 0.0003 | 0.0003 | 0.3566 | 0.7016 | 0.2452 |
| Anaerovorax           | 0.0000 | 0.0016 | 0.0000 | 0.0000 | 0.0000 | 0.0000 | 0.0001 | 0.0002 | 0.0000 | 0.0000 | 0.3655 | 0.4585 | 0.1853 |
| Proteiniphilum        | 0.0005 | 0.0000 | 0.0001 | 0.0000 | 0.0001 | 0.0001 | 0.0001 | 0.0001 | 0.0001 | 0.0001 | 0.3668 | 0.5012 | 0.3993 |
| Oribacterium          | 0.0003 | 0.0013 | 0.0013 | 0.0006 | 0.0009 | 0.0004 | 0.0005 | 0.0012 | 0.0007 | 0.0007 | 0.3693 | 0.7014 | 0.4653 |
| Dialister             | 0.0004 | 0.0001 | 0.0001 | 0.0000 | 0.0001 | 0.0000 | 0.0001 | 0.0000 | 0.0000 | 0.0000 | 0.3711 | 0.3011 | 0.6462 |
| Intestinimonas        | 0.0000 | 0.0003 | 0.0000 | 0.0000 | 0.0000 | 0.0000 | 0.0002 | 0.0006 | 0.0001 | 0.0001 | 0.3780 | 0.4310 | 0.2005 |
| Paraprevotella        | 0.0013 | 0.0009 | 0.0004 | 0.0005 | 0.0005 | 0.0008 | 0.0008 | 0.0005 | 0.0003 | 0.0003 | 0.3902 | 0.3590 | 0.8541 |
| Treponema             | 0.0009 | 0.0243 | 0.0009 | 0.0003 | 0.0013 | 0.0021 | 0.0078 | 0.0011 | 0.0009 | 0.0009 | 0.3925 | 0.5416 | 0.4243 |
| Eubacterium           | 0.0013 | 0.0019 | 0.0006 | 0.0004 | 0.0006 | 0.0014 | 0.0016 | 0.0016 | 0.0009 | 0.0009 | 0.3962 | 0.8069 | 0.2077 |
| Faecalibacterium      | 0.0002 | 0.0019 | 0.0002 | 0.0001 | 0.0001 | 0.0004 | 0.0004 | 0.0004 | 0.0002 | 0.0002 | 0.4144 | 0.5215 | 0.3797 |
| Chlamydia             | 0.0008 | 0.0005 | 0.0002 | 0.0002 | 0.0009 | 0.0018 | 0.0014 | 0.0001 | 0.0005 | 0.0005 | 0.4366 | 0.6983 | 0.6713 |
| Streptococcus         | 0.0003 | 0.0002 | 0.0002 | 0.0001 | 0.0002 | 0.0003 | 0.0003 | 0.0004 | 0.0002 | 0.0002 | 0.4396 | 0.3636 | 0.2316 |
| Dorea                 | 0.0009 | 0.0001 | 0.0001 | 0.0001 | 0.0002 | 0.0002 | 0.0001 | 0.0004 | 0.0002 | 0.0002 | 0.4533 | 0.6005 | 0.6150 |
| Alloprevotella        | 0.0027 | 0.0004 | 0.0010 | 0.0002 | 0.0007 | 0.0013 | 0.0026 | 0.0017 | 0.0007 | 0.0007 | 0.4576 | 0.7317 | 0.2012 |
| Bifidobacterium       | 0.0000 | 0.0001 | 0.0000 | 0.0000 | 0.0001 | 0.0002 | 0.0001 | 0.0003 | 0.0001 | 0.0001 | 0.4654 | 0.2677 | 0.6240 |
| Burkholderia          | 0.0000 | 0.0001 | 0.0000 | 0.0000 | 0.0001 | 0.0001 | 0.0001 | 0.0000 | 0.0001 | 0.0001 | 0.4821 | 0.1187 | 0.2943 |
| Capnocytophaga        | 0.0003 | 0.0000 | 0.0000 | 0.0000 | 0.0002 | 0.0004 | 0.0002 | 0.0000 | 0.0001 | 0.0001 | 0.4904 | 0.9240 | 0.4270 |
| Subdoligranulum       | 0.0000 | 0.0004 | 0.0000 | 0.0000 | 0.0001 | 0.0000 | 0.0004 | 0.0001 | 0.0001 | 0.0001 | 0.5005 | 0.7706 | 0.1879 |
| Fusobacterium         | 0.0002 | 0.0001 | 0.0000 | 0.0000 | 0.0001 | 0.0001 | 0.0005 | 0.0006 | 0.0002 | 0.0002 | 0.5276 | 0.0952 | 0.0651 |
| Mycoplasma            | 0.0004 | 0.0001 | 0.0000 | 0.0001 | 0.0001 | 0.0001 | 0.0001 | 0.0001 | 0.0002 | 0.0002 | 0.5368 | 0.6354 | 0.7791 |
| Anaerovibrio          | 0.0006 | 0.0000 | 0.0001 | 0.0001 | 0.0005 | 0.0007 | 0.0003 | 0.0001 | 0.0001 | 0.0001 | 0.5477 | 0.7613 | 0.3137 |
| Succinivibrio         | 0.0032 | 0.0001 | 0.0001 | 0.0003 | 0.0087 | 0.0003 | 0.0009 | 0.0000 | 0.0001 | 0.0001 | 0.5482 | 0.5161 | 0.3881 |
| Bacteroides           | 0.0375 | 0.0307 | 0.0262 | 0.0170 | 0.0171 | 0.0430 | 0.0326 | 0.0214 | 0.0144 | 0.0144 | 0.5693 | 0.2388 | 0.7886 |
| Phascolarctobacterium | 0.0022 | 0.0004 | 0.0005 | 0.0005 | 0.0011 | 0.0003 | 0.0022 | 0.0005 | 0.0005 | 0.0005 | 0.5729 | 0.9589 | 0.5337 |
| Spirochaeta           | 0.0003 | 0.0002 | 0.0000 | 0.0000 | 0.0000 | 0.0014 | 0.0001 | 0.0000 | 0.0001 | 0.0001 | 0.5782 | 0.2765 | 0.4413 |
| Succinatimonas        | 0.0065 | 0.0002 | 0.0002 | 0.0014 | 0.0014 | 0.0002 | 0.0017 | 0.0012 | 0.0002 | 0.0002 | 0.5810 | 0.5815 | 0.9956 |
| Sutterella            | 0.0001 | 0.0001 | 0.0000 | 0.0000 | 0.0002 | 0.0001 | 0.0001 | 0.0001 | 0.0001 | 0.0001 | 0.5921 | 0.6987 | 0.7087 |
| Barnesiella           | 0.0025 | 0.0003 | 0.0012 | 0.0010 | 0.0008 | 0.0050 | 0.0004 | 0.0004 | 0.0003 | 0.0003 | 0.5932 | 0.2051 | 0.2477 |
| Lachnoanaerobaculum   | 0.0000 | 0.0001 | 0.0001 | 0.0000 | 0.0001 | 0.0001 | 0.0000 | 0.0001 | 0.0000 | 0.0000 | 0.6071 | 0.5583 | 0.3413 |
| Dysgonomonas          | 0.0008 | 0.0003 | 0.0004 | 0.0001 | 0.0003 | 0.0007 | 0.0005 | 0.0003 | 0.0004 | 0.0004 | 0.6120 | 0.7546 | 0.6930 |
| Anaerophaga           | 0.0008 | 0.0001 | 0.0000 | 0.0000 | 0.0001 | 0.0004 | 0.0000 | 0.0002 | 0.0001 | 0.0001 | 0.6275 | 0.5390 | 0.7939 |
| Porphyromonas         | 0.0018 | 0.0006 | 0.0006 | 0.0004 | 0.0006 | 0.0013 | 0.0006 | 0.0006 | 0.0008 | 0.0008 | 0.6284 | 0.4676 | 0.7815 |
| Draconibacterium      | 0.0001 | 0.0000 | 0.0001 | 0.0000 | 0.0001 | 0.0003 | 0.0002 | 0.0007 | 0.0003 | 0.0003 | 0.6530 | 0.0944 | 0.2087 |

|                 |        |        |        |        |        |        |        |        |        |        |        |        |
|-----------------|--------|--------|--------|--------|--------|--------|--------|--------|--------|--------|--------|--------|
| Parabacteroides | 0.0040 | 0.0013 | 0.0014 | 0.0009 | 0.0010 | 0.0032 | 0.0015 | 0.0012 | 0.0008 | 0.6779 | 0.3122 | 0.5222 |
| Acetobacter     | 0.0000 | 0.0000 | 0.0000 | 0.0000 | 0.0000 | 0.0000 | 0.0001 | 0.0003 | 0.0001 | 0.6779 | 0.0247 | 0.0232 |
| Desulfovibrio   | 0.0000 | 0.0002 | 0.0000 | 0.0000 | 0.0001 | 0.0000 | 0.0003 | 0.0001 | 0.0001 | 0.6869 | 0.5681 | 0.3040 |
| Prevotella      | 0.1926 | 0.0960 | 0.2001 | 0.1930 | 0.1437 | 0.1962 | 0.0945 | 0.1005 | 0.0719 | 0.7145 | 0.0997 | 0.0097 |
| Fibrobacter     | 0.0007 | 0.0112 | 0.0011 | 0.0050 | 0.0031 | 0.0007 | 0.0003 | 0.0000 | 0.0002 | 0.7186 | 0.2874 | 0.0876 |
| Sunxiuqinia     | 0.0005 | 0.0001 | 0.0000 | 0.0000 | 0.0000 | 0.0004 | 0.0001 | 0.0000 | 0.0003 | 0.7589 | 0.7298 | 0.9794 |
| Blautia         | 0.0001 | 0.0006 | 0.0002 | 0.0002 | 0.0002 | 0.0007 | 0.0004 | 0.0006 | 0.0002 | 0.7783 | 0.6711 | 0.9060 |
| Marinifilum     | 0.0005 | 0.0001 | 0.0001 | 0.0000 | 0.0002 | 0.0007 | 0.0002 | 0.0005 | 0.0001 | 0.7888 | 0.9123 | 0.8420 |
| Odoribacter     | 0.0021 | 0.0002 | 0.0003 | 0.0003 | 0.0006 | 0.0011 | 0.0008 | 0.0010 | 0.0004 | 0.7994 | 0.8847 | 0.7943 |
| Enterococcus    | 0.0001 | 0.0004 | 0.0000 | 0.0000 | 0.0001 | 0.0005 | 0.0001 | 0.0000 | 0.0001 | 0.8120 | 0.3831 | 0.2953 |
| Veillonella     | 0.0006 | 0.0001 | 0.0001 | 0.0003 | 0.0002 | 0.0000 | 0.0001 | 0.0000 | 0.0000 | 0.8122 | 0.3484 | 0.2041 |
| Elusimicrobium  | 0.0000 | 0.0001 | 0.0000 | 0.0000 | 0.0001 | 0.0001 | 0.0002 | 0.0064 | 0.0001 | 0.8192 | 0.3503 | 0.3522 |
| Acinetobacter   | 0.0000 | 0.0002 | 0.0000 | 0.0000 | 0.0001 | 0.0001 | 0.0009 | 0.0002 | 0.0008 | 0.8787 | 0.0785 | 0.0661 |
| Oscillibacter   | 0.0005 | 0.0010 | 0.0004 | 0.0001 | 0.0003 | 0.0013 | 0.0026 | 0.0006 | 0.0004 | 0.9045 | 0.5018 | 0.4981 |
| Bacillus        | 0.0005 | 0.0004 | 0.0001 | 0.0002 | 0.0003 | 0.0004 | 0.0003 | 0.0006 | 0.0003 | 0.9093 | 0.7410 | 0.6236 |
| Tannerella      | 0.0018 | 0.0002 | 0.0005 | 0.0007 | 0.0006 | 0.0011 | 0.0004 | 0.0010 | 0.0003 | 0.9184 | 0.6372 | 0.4672 |
| Prolixibacter   | 0.0000 | 0.0002 | 0.0001 | 0.0000 | 0.0002 | 0.0002 | 0.0002 | 0.0002 | 0.0002 | 0.9257 | 0.1916 | 0.1778 |
| Akkermansia     | 0.0002 | 0.0004 | 0.0001 | 0.0000 | 0.0000 | 0.0006 | 0.0002 | 0.0003 | 0.0002 | 0.9407 | 0.8268 | 0.8545 |
| Pseudomonas     | 0.0000 | 0.0003 | 0.0001 | 0.0001 | 0.0000 | 0.0003 | 0.0003 | 0.0002 | 0.0002 | 0.9591 | 0.3000 | 0.2871 |
| Flavobacterium  | 0.0010 | 0.0003 | 0.0001 | 0.0001 | 0.0004 | 0.0009 | 0.0003 | 0.0003 | 0.0002 | 0.9683 | 0.4627 | 0.4908 |

---

Supplementary Table S4. Comparison of the change in rumen methanogens of three treatment groups.

| Taxa                                        | 0 mg   |        |        | 52 mg  |        |        | 91 mg  |        |        | T-test |        |        |
|---------------------------------------------|--------|--------|--------|--------|--------|--------|--------|--------|--------|--------|--------|--------|
|                                             | 0-1    | 0-2    | 0-3    | 52-1   | 52-2   | 52-3   | 91-1   | 91-2   | 91-3   | 0 52   | 0 91   | 52 91  |
| Methanobrevibacter                          | 0.0001 | 0.0004 | 0.0025 | 0.0002 | 0.0001 | 0.0004 | 0.0002 | 0.0024 | 0.0023 | 0.3753 | 0.5759 | 0.1234 |
| methanogenic archaeon mixed culture ISO4-G1 | 0.0000 | 0.0000 | 0.0000 | 0.0000 | 0.0000 | 0.0007 | 0.0000 | 0.0000 | 0.0000 | 0.3838 | 0.8324 | 0.3904 |
| Methanobacteria                             | 0.0001 | 0.0004 | 0.0026 | 0.0002 | 0.0002 | 0.0004 | 0.0003 | 0.0027 | 0.0025 | 0.3966 | 0.5016 | 0.1152 |
| Methanobacteriaceae                         | 0.0001 | 0.0004 | 0.0026 | 0.0002 | 0.0002 | 0.0004 | 0.0003 | 0.0027 | 0.0025 | 0.3966 | 0.5016 | 0.1152 |
| Methanobacteriales                          | 0.0001 | 0.0004 | 0.0026 | 0.0002 | 0.0002 | 0.0004 | 0.0003 | 0.0027 | 0.0025 | 0.3966 | 0.5016 | 0.1152 |
| Methanomassiliicoccaceae                    | 0.0000 | 0.0001 | 0.0000 | 0.0000 | 0.0000 | 0.0013 | 0.0000 | 0.0000 | 0.0000 | 0.4003 | 0.3107 | 0.3642 |
| Methanomassiliicoccales                     | 0.0000 | 0.0001 | 0.0000 | 0.0000 | 0.0000 | 0.0013 | 0.0000 | 0.0000 | 0.0000 | 0.4003 | 0.3107 | 0.3642 |
| Methanobrevibacter millerae                 | 0.0000 | 0.0001 | 0.0017 | 0.0000 | 0.0001 | 0.0002 | 0.0001 | 0.0022 | 0.0016 | 0.4140 | 0.4463 | 0.1221 |
| Methanomicrobiaceae                         | 0.0011 | 0.0001 | 0.0000 | 0.0000 | 0.0000 | 0.0003 | 0.0000 | 0.0000 | 0.0000 | 0.4724 | 0.3442 | 0.4072 |
| Methanobrevibacter sp. YE315                | 0.0000 | 0.0000 | 0.0004 | 0.0000 | 0.0000 | 0.0001 | 0.0000 | 0.0001 | 0.0001 | 0.5537 | 0.7546 | 0.4782 |
| Methanomicrobiales                          | 0.0014 | 0.0001 | 0.0000 | 0.0000 | 0.0000 | 0.0010 | 0.0000 | 0.0000 | 0.0000 | 0.7898 | 0.3484 | 0.3945 |
| Methanomicrobia                             | 0.0014 | 0.0001 | 0.0000 | 0.0000 | 0.0000 | 0.0014 | 0.0001 | 0.0004 | 0.0002 | 0.9443 | 0.5461 | 0.6236 |

**Supplementary Table S5. Comparisons of the functions of the rumen bacterial microbiota in three treatment group.**

| taxa                                                 | 0 mg |      |      | 52 mg |      |      | 91 mg |      |      | T-test |      |       |
|------------------------------------------------------|------|------|------|-------|------|------|-------|------|------|--------|------|-------|
|                                                      | 0-1  | 0-2  | 0-3  | 52-1  | 52-2 | 52-3 | 91-1  | 91-2 | 91-3 | 0_52   | 0_91 | 51_91 |
| K1001100 Metabolism                                  | 2852 | 3246 | 2035 | 2314  | 3161 | 2735 | 2100  | 1918 | 1886 | 0.96   | 0.11 | 0.04  |
| K2000011 Genetic Information Processing              | 1131 | 1146 | 830  | 1051  | 1414 | 1254 | 984   | 1020 | 950  | 0.24   | 0.65 | 0.08  |
| Carbohydrate Metabolism                              | 868  | 863  | 640  | 643   | 871  | 772  | 608   | 555  | 552  | 0.79   | 0.05 | 0.05  |
| Amino Acid Metabolism                                | 757  | 885  | 532  | 633   | 893  | 706  | 556   | 465  | 481  | 0.89   | 0.10 | 0.04  |
| Nucleotide Metabolism                                | 551  | 600  | 388  | 448   | 627  | 557  | 433   | 378  | 377  | 0.73   | 0.15 | 0.06  |
| K2000016 Environmental Information Processing        | 500  | 549  | 387  | 475   | 700  | 592  | 437   | 496  | 477  | 0.24   | 0.87 | 0.15  |
| Energy Metabolism                                    | 489  | 557  | 346  | 404   | 546  | 481  | 399   | 355  | 326  | 0.87   | 0.19 | 0.06  |
| Replication and Repair                               | 427  | 453  | 291  | 353   | 440  | 397  | 263   | 257  | 251  | 0.92   | 0.06 | 0.01  |
| K2000013 Translation                                 | 409  | 453  | 265  | 367   | 489  | 434  | 386   | 375  | 315  | 0.46   | 0.79 | 0.16  |
| K1000230 Purine metabolism                           | 409  | 424  | 303  | 342   | 478  | 431  | 319   | 283  | 278  | 0.53   | 0.10 | 0.04  |
| Metabolism of Cofactors and Vitamins                 | 390  | 538  | 261  | 325   | 452  | 385  | 256   | 239  | 240  | 0.92   | 0.13 | 0.02  |
| K1000240 Pyrimidine metabolism                       | 375  | 416  | 252  | 294   | 400  | 366  | 282   | 246  | 250  | 0.93   | 0.16 | 0.05  |
| Membrane Transport                                   | 322  | 371  | 211  | 252   | 340  | 263  | 181   | 186  | 179  | 0.78   | 0.07 | 0.02  |
| K2000020 Cellular Processes                          | 268  | 222  | 288  | 416   | 699  | 620  | 459   | 556  | 547  | 0.02   | 0.00 | 0.56  |
| Glycan Biosynthesis and Metabolism                   | 253  | 269  | 193  | 222   | 287  | 272  | 177   | 189  | 183  | 0.51   | 0.08 | 0.02  |
| K1000970 Aminoacyl-tRNA biosynthesis                 | 242  | 248  | 175  | 192   | 263  | 241  | 198   | 192  | 165  | 0.76   | 0.22 | 0.11  |
| K1000500 Starch and sucrose metabolism               | 221  | 186  | 176  | 161   | 213  | 178  | 134   | 131  | 116  | 0.64   | 0.01 | 0.02  |
| Folding, Sorting and Degradation                     | 218  | 170  | 191  | 230   | 351  | 292  | 223   | 265  | 258  | 0.06   | 0.04 | 0.32  |
| K1000250 Alanine, aspartate and glutamate metabolism | 214  | 213  | 154  | 143   | 219  | 176  | 164   | 137  | 138  | 0.65   | 0.09 | 0.24  |
| K1002010 ABC transporters                            | 211  | 254  | 144  | 168   | 220  | 168  | 119   | 133  | 125  | 0.65   | 0.07 | 0.03  |
| Lipid Metabolism                                     | 209  | 213  | 148  | 163   | 210  | 204  | 168   | 160  | 170  | 0.93   | 0.32 | 0.16  |
| Metabolism of Other Amino Acids                      | 193  | 229  | 152  | 159   | 218  | 183  | 113   | 117  | 114  | 0.88   | 0.03 | 0.01  |
| K1003440 Homologous recombination                    | 192  | 209  | 122  | 182   | 230  | 206  | 112   | 102  | 103  | 0.35   | 0.06 | 0.00  |
| K1003430 Mismatch repair                             | 187  | 187  | 134  | 146   | 188  | 173  | 99    | 107  | 94   | 0.99   | 0.02 | 0.01  |
| Signal Transduction                                  | 180  | 181  | 177  | 225   | 361  | 326  | 256   | 309  | 298  | 0.04   | 0.00 | 0.73  |
| K2000025 Organismal Systems                          | 177  | 69   | 229  | 301   | 516  | 454  | 342   | 444  | 427  | 0.03   | 0.01 | 0.80  |
| K1000520 Amino sugar and nucleotide sugar metabolism | 170  | 206  | 115  | 126   | 172  | 164  | 161   | 148  | 135  | 0.76   | 0.60 | 0.73  |
| K1003010 Ribosome                                    | 167  | 205  | 90   | 175   | 226  | 193  | 188   | 183  | 150  | 0.30   | 0.61 | 0.27  |
| Cell Growth and Death                                | 163  | 131  | 138  | 185   | 299  | 270  | 208   | 236  | 227  | 0.04   | 0.00 | 0.48  |
| K1000330 Arginine and proline metabolism             | 152  | 158  | 95   | 136   | 192  | 163  | 108   | 103  | 101  | 0.33   | 0.20 | 0.02  |
| K1003030 DNA replication                             | 147  | 170  | 103  | 146   | 191  | 165  | 88    | 89   | 83   | 0.31   | 0.05 | 0.00  |
| K1003420 Nucleotide excision repair                  | 140  | 125  | 98   | 101   | 138  | 120  | 100   | 91   | 92   | 0.94   | 0.10 | 0.08  |
| Biosynthesis of Other Secondary Metabolites          | 130  | 116  | 99   | 89    | 137  | 119  | 81    | 86   | 70   | 1.00   | 0.02 | 0.07  |
| K2000034 Human Diseases                              | 126  | 84   | 141  | 198   | 296  | 275  | 181   | 251  | 245  | 0.02   | 0.02 | 0.46  |



|                                                            |     |     |     |     |     |     |     |     |     |      |      |      |
|------------------------------------------------------------|-----|-----|-----|-----|-----|-----|-----|-----|-----|------|------|------|
| K1000910 Nitrogen metabolism                               | 125 | 124 | 91  | 86  | 119 | 124 | 95  | 81  | 79  | 0.83 | 0.08 | 0.13 |
| K1000052 Galactose metabolism                              | 121 | 108 | 86  | 79  | 116 | 114 | 86  | 79  | 90  | 0.91 | 0.14 | 0.22 |
| K1000190 Oxidative phosphorylation                         | 117 | 138 | 85  | 109 | 150 | 132 | 116 | 106 | 95  | 0.43 | 0.67 | 0.14 |
| Biosynthesis of Polyketides and Terpenoids                 | 115 | 144 | 81  | 100 | 138 | 111 | 71  | 76  | 64  | 0.90 | 0.08 | 0.02 |
| K1000010 Glycolysis / Gluconeogenesis                      | 114 | 113 | 76  | 84  | 106 | 103 | 92  | 89  | 91  | 0.83 | 0.46 | 0.37 |
| K1000270 Cysteine and methionine metabolism                | 113 | 150 | 82  | 97  | 150 | 104 | 90  | 72  | 69  | 0.94 | 0.14 | 0.09 |
| K1000680 Methane metabolism                                | 112 | 133 | 64  | 83  | 106 | 87  | 93  | 69  | 80  | 0.64 | 0.36 | 0.32 |
| K1000550 Peptidoglycan biosynthesis                        | 112 | 129 | 77  | 97  | 125 | 119 | 63  | 67  | 57  | 0.68 | 0.05 | 0.00 |
| K1004112 Cell cycle - Caulobacter                          | 111 | 127 | 67  | 80  | 117 | 100 | 71  | 56  | 57  | 0.90 | 0.10 | 0.03 |
| Endocrine System                                           | 104 | 53  | 110 | 130 | 210 | 191 | 152 | 194 | 191 | 0.04 | 0.02 | 0.95 |
| K1000290 Valine, leucine and isoleucine biosynthesis       | 104 | 106 | 80  | 99  | 137 | 97  | 77  | 72  | 79  | 0.41 | 0.07 | 0.06 |
| K1000710 Carbon fixation in photosynthetic organisms       | 104 | 109 | 67  | 77  | 107 | 91  | 68  | 77  | 62  | 0.92 | 0.16 | 0.08 |
| K1000620 Pyruvate metabolism                               | 103 | 125 | 68  | 69  | 110 | 94  | 80  | 62  | 68  | 0.73 | 0.18 | 0.18 |
| K1003018 RNA degradation                                   | 101 | 75  | 76  | 82  | 132 | 112 | 93  | 103 | 101 | 0.22 | 0.17 | 0.55 |
| K1002020 Two-component system                              | 101 | 159 | 57  | 67  | 108 | 98  | 90  | 73  | 76  | 0.67 | 0.43 | 0.45 |
| K1003070 Bacterial secretion system                        | 98  | 95  | 61  | 76  | 95  | 77  | 56  | 47  | 49  | 0.89 | 0.05 | 0.01 |
| K1000000 Biosynthesis of methionine, lysine and tryptophan | 97  | 119 | 58  | 83  | 111 | 79  | 61  | 41  | 52  | 0.99 | 0.10 | 0.03 |
| K1003060 Protein export                                    | 95  | 94  | 65  | 73  | 98  | 80  | 46  | 53  | 52  | 0.94 | 0.03 | 0.01 |
| K1000040 Pentose and glucuronate interconversions          | 93  | 90  | 57  | 61  | 80  | 78  | 51  | 41  | 46  | 0.62 | 0.05 | 0.02 |
| K1000260 Glycine, serine and threonine metabolism          | 89  | 104 | 68  | 66  | 95  | 72  | 59  | 50  | 48  | 0.53 | 0.03 | 0.06 |
| K1000051 Fructose and mannose metabolism                   | 89  | 93  | 67  | 82  | 105 | 83  | 73  | 59  | 67  | 0.56 | 0.14 | 0.05 |
| Xenobiotics Biodegradation and Metabolism                  | 89  | 90  | 51  | 72  | 95  | 79  | 75  | 69  | 68  | 0.73 | 0.67 | 0.19 |
| K1000020 Citrate cycle (TCA cycle)                         | 86  | 87  | 66  | 62  | 91  | 80  | 57  | 44  | 48  | 0.86 | 0.02 | 0.04 |
| Transport and Catabolism                                   | 81  | 34  | 120 | 179 | 290 | 258 | 177 | 227 | 235 | 0.02 | 0.01 | 0.48 |
| K2000012 Transcription                                     | 79  | 70  | 85  | 102 | 138 | 132 | 112 | 125 | 127 | 0.02 | 0.00 | 0.84 |
| K1000030 Pentose phosphate pathway                         | 78  | 86  | 53  | 75  | 93  | 76  | 63  | 61  | 56  | 0.48 | 0.29 | 0.03 |
| K1000670 One carbon pool by folate                         | 74  | 95  | 49  | 67  | 90  | 67  | 52  | 39  | 37  | 0.90 | 0.10 | 0.02 |
| K1000720 Carbon fixation pathways in prokaryotes           | 70  | 64  | 54  | 56  | 76  | 61  | 39  | 34  | 31  | 0.84 | 0.01 | 0.01 |
| K1000770 Pantothenate and CoA biosynthesis                 | 69  | 78  | 50  | 52  | 80  | 56  | 29  | 31  | 41  | 0.82 | 0.02 | 0.04 |
| K1000300 Lysine biosynthesis                               | 67  | 96  | 56  | 59  | 92  | 69  | 47  | 43  | 42  | 0.98 | 0.07 | 0.04 |
| K1003410 Base excision repair                              | 65  | 78  | 44  | 69  | 90  | 75  | 58  | 49  | 53  | 0.25 | 0.43 | 0.02 |
| K1000460 Cyanoamino acid metabolism                        | 64  | 55  | 57  | 39  | 54  | 47  | 30  | 32  | 27  | 0.08 | 0.00 | 0.02 |
| K1003020 RNA polymerase                                    | 64  | 69  | 54  | 59  | 78  | 86  | 67  | 60  | 61  | 0.26 | 0.95 | 0.23 |
| K1000600 Sphingolipid metabolism                           | 63  | 44  | 44  | 47  | 64  | 67  | 41  | 41  | 46  | 0.37 | 0.31 | 0.06 |
| K1000564 Glycerophospholipid metabolism                    | 61  | 73  | 48  | 48  | 59  | 55  | 51  | 60  | 56  | 0.45 | 0.55 | 0.71 |
| K1000511 Other glycan degradation                          | 61  | 42  | 53  | 40  | 48  | 58  | 41  | 33  | 45  | 0.68 | 0.13 | 0.23 |
| K1004910 Insulin signaling pathway                         | 60  | 29  | 67  | 73  | 114 | 99  | 88  | 116 | 113 | 0.06 | 0.02 | 0.53 |

|                                                                |    |    |    |     |     |     |    |     |     |      |      |      |
|----------------------------------------------------------------|----|----|----|-----|-----|-----|----|-----|-----|------|------|------|
| K1000900 Terpenoid backbone biosynthesis                       | 59 | 78 | 43 | 45  | 67  | 51  | 35 | 37  | 33  | 0.66 | 0.07 | 0.04 |
| K1000650 Butanoate metabolism                                  | 59 | 51 | 42 | 33  | 65  | 54  | 37 | 28  | 33  | 1.00 | 0.03 | 0.14 |
| K1000860 Porphyrin and chlorophyll metabolism                  | 55 | 89 | 40 | 56  | 60  | 65  | 54 | 40  | 33  | 0.95 | 0.29 | 0.05 |
| Environmental Adaptation                                       | 54 | 29 | 65 | 117 | 172 | 158 | 96 | 137 | 126 | 0.01 | 0.01 | 0.23 |
| K1000340 Histidine metabolism                                  | 54 | 75 | 31 | 42  | 65  | 47  | 30 | 27  | 32  | 0.90 | 0.14 | 0.04 |
| K1000630 Glyoxylate and dicarboxylate metabolism               | 53 | 60 | 27 | 31  | 38  | 33  | 30 | 31  | 30  | 0.28 | 0.18 | 0.16 |
| K1000521 Streptomycin biosynthesis                             | 53 | 52 | 40 | 43  | 58  | 51  | 38 | 42  | 33  | 0.72 | 0.10 | 0.06 |
| K1000760 Nicotinate and nicotinamide metabolism                | 53 | 71 | 42 | 41  | 62  | 59  | 31 | 42  | 34  | 0.91 | 0.10 | 0.07 |
| K1000940 Phenylpropanoid biosynthesis                          | 49 | 31 | 42 | 22  | 41  | 38  | 23 | 25  | 22  | 0.42 | 0.03 | 0.16 |
| K1000983 Drug metabolism - other enzymes                       | 49 | 43 | 24 | 41  | 50  | 37  | 40 | 40  | 33  | 0.66 | 0.91 | 0.33 |
| Cell Communication                                             | 48 | 0  | 65 | 66  | 118 | 100 | 94 | 117 | 113 | 0.08 | 0.03 | 0.47 |
| K03701 excinuclease ABC subunit A                              | 48 | 41 | 32 | 26  | 33  | 35  | 37 | 27  | 30  | 0.17 | 0.18 | 1.00 |
| K05349 beta-glucosidase [EC:3.2.1.21]                          | 48 | 30 | 42 | 22  | 41  | 38  | 23 | 25  | 22  | 0.47 | 0.04 | 0.16 |
| K1000640 Propanoate metabolism                                 | 46 | 57 | 26 | 44  | 60  | 43  | 39 | 30  | 26  | 0.60 | 0.31 | 0.06 |
| K1000540 Lipopolysaccharide biosynthesis                       | 46 | 60 | 34 | 50  | 62  | 43  | 35 | 42  | 31  | 0.62 | 0.26 | 0.07 |
| Infectious Diseases                                            | 45 | 38 | 33 | 40  | 77  | 70  | 47 | 55  | 57  | 0.12 | 0.04 | 0.47 |
| K1000450 Selenocompound metabolism                             | 44 | 61 | 28 | 43  | 62  | 51  | 30 | 35  | 34  | 0.52 | 0.31 | 0.03 |
| K01190 beta-galactosidase [EC:3.2.1.23]                        | 40 | 25 | 30 | 32  | 39  | 41  | 22 | 22  | 27  | 0.34 | 0.16 | 0.01 |
| K1004626 Plant-pathogen interaction                            | 39 | 29 | 44 | 82  | 121 | 112 | 71 | 96  | 90  | 0.01 | 0.01 | 0.24 |
| K01955 carbamoyl-phosphate synthase large subunit [EC:6.3.5.5] | 38 | 26 | 23 | 25  | 32  | 21  | 30 | 18  | 20  | 0.62 | 0.34 | 0.53 |
| Nervous System                                                 | 37 | 0  | 54 | 61  | 103 | 89  | 87 | 112 | 108 | 0.06 | 0.02 | 0.28 |
| K1000561 Glycerolipid metabolism                               | 36 | 47 | 17 | 24  | 34  | 32  | 37 | 33  | 31  | 0.74 | 0.97 | 0.36 |
| K1000730 Thiamine metabolism                                   | 35 | 55 | 19 | 20  | 29  | 31  | 22 | 17  | 21  | 0.43 | 0.20 | 0.15 |
| K1000061 Fatty acid biosynthesis                               | 35 | 53 | 20 | 33  | 46  | 40  | 30 | 18  | 23  | 0.74 | 0.29 | 0.04 |
| Neurodegenerative Diseases                                     | 34 | 13 | 56 | 82  | 108 | 103 | 70 | 110 | 106 | 0.01 | 0.03 | 0.88 |
| Immune System                                                  | 34 | 12 | 52 | 52  | 90  | 82  | 81 | 106 | 104 | 0.06 | 0.01 | 0.19 |

**Supplementary Table S6. EOC-associated KO pathways.**

| taxa                                                                                  | 0mg |     |     | 52mg |      |      | T-test      | FDR         |
|---------------------------------------------------------------------------------------|-----|-----|-----|------|------|------|-------------|-------------|
|                                                                                       | 0-1 | 0-2 | 0-3 | 52-1 | 52-2 | 52-3 |             |             |
| K2000020 Cellular Processes                                                           | 268 | 222 | 288 | 416  | 699  | 620  | 0.021092957 | 0.034719627 |
| K2000025 Organismal Systems                                                           | 177 | 69  | 229 | 301  | 516  | 454  | 0.028776583 | 0.03847304  |
| K2000034 Human Diseases                                                               | 126 | 84  | 141 | 198  | 296  | 275  | 0.015363552 | 0.030523093 |
| K2000012 Transcription                                                                | 79  | 70  | 85  | 102  | 138  | 132  | 0.018354004 | 0.032350931 |
| K1004626 Plant-pathogen interaction                                                   | 39  | 29  | 44  | 82   | 121  | 112  | 0.00578517  | 0.030523093 |
| K2000035 Cancers                                                                      | 31  | 12  | 45  | 59   | 84   | 78   | 0.021936618 | 0.035502684 |
| K1005200 Pathways in cancer                                                           | 29  | 12  | 40  | 44   | 68   | 61   | 0.047163492 | 0.048606172 |
| K1004914 Progesterone-mediated oocyte maturation                                      | 29  | 12  | 31  | 44   | 77   | 69   | 0.027685954 | 0.037628424 |
| K1004070 Phosphatidylinositol signaling system                                        | 28  | 18  | 39  | 42   | 58   | 54   | 0.041061191 | 0.045500239 |
| K1004144 Endocytosis                                                                  | 28  | 0   | 55  | 97   | 163  | 136  | 0.013771702 | 0.030523093 |
| K1004114 Oocyte meiosis                                                               | 27  | 0   | 39  | 63   | 95   | 85   | 0.01672169  | 0.030698028 |
| K00688 starch phosphorylase [EC:2.4.1.1]                                              | 26  | 22  | 19  | 11   | 11   | 9    | 0.004920932 | 0.030523093 |
| K1004142 Lysosome                                                                     | 25  | 11  | 32  | 40   | 61   | 67   | 0.031337788 | 0.040838257 |
| K01006 pyruvate, orthophosphate dikinase [EC:2.7.9.1]                                 | 23  | 24  | 17  | 12   | 12   | 17   | 0.049354377 | 0.049354377 |
| K1005214 Glioma                                                                       | 19  | 0   | 26  | 35   | 41   | 38   | 0.044558795 | 0.048076595 |
| K1004530 Tight junction                                                               | 19  | 0   | 27  | 34   | 48   | 42   | 0.044257673 | 0.04796206  |
| K1004340 Hedgehog signaling pathway                                                   | 18  | 1   | 27  | 43   | 70   | 63   | 0.017564621 | 0.03177713  |
| K1004150 mTOR signaling pathway                                                       | 17  | 0   | 28  | 32   | 56   | 48   | 0.048070274 | 0.048979839 |
| K13412 calcium-dependent protein kinase [EC:2.7.11.1]                                 | 17  | 0   | 27  | 48   | 84   | 72   | 0.015579542 | 0.030523093 |
| K01740 O-acetylhomoserine (thiol)-lyase [EC:2.5.1.49]                                 | 16  | 14  | 16  | 7    | 12   | 2    | 0.048183419 | 0.048979839 |
| K1004722 Neurotrophin signaling pathway                                               | 16  | 0   | 23  | 32   | 36   | 35   | 0.036704115 | 0.044699071 |
| K1004113 Meiosis - yeast                                                              | 16  | 0   | 23  | 31   | 60   | 51   | 0.03494535  | 0.044020152 |
| K1004270 Vascular smooth muscle contraction                                           | 16  | 0   | 21  | 31   | 47   | 41   | 0.025480198 | 0.035951532 |
| K1004720 Long-term potentiation                                                       | 16  | 0   | 22  | 36   | 50   | 44   | 0.016486323 | 0.03058205  |
| K1005010 Alzheimer's disease                                                          | 15  | 8   | 16  | 25   | 27   | 27   | 0.006879081 | 0.030523093 |
| K1004111 Cell cycle - yeast                                                           | 14  | 2   | 21  | 33   | 57   | 53   | 0.01889863  | 0.032520746 |
| K1004120 Ubiquitin mediated proteolysis                                               | 13  | 0   | 32  | 42   | 67   | 47   | 0.037067686 | 0.044796295 |
| K1003040 Spliceosome                                                                  | 13  | 1   | 26  | 33   | 50   | 39   | 0.03562386  | 0.044037535 |
| K1004010 MAPK signaling pathway                                                       | 13  | 0   | 18  | 24   | 38   | 32   | 0.035430854 | 0.044020152 |
| K1004916 Melanogenesis                                                                | 12  | 0   | 16  | 26   | 38   | 33   | 0.017910703 | 0.031927775 |
| K1004912 GnRH signaling pathway                                                       | 12  | 0   | 18  | 31   | 40   | 37   | 0.011738602 | 0.030523093 |
| K03702 excinuclease ABC subunit B                                                     | 11  | 13  | 9   | 8    | 6    | 6    | 0.031375734 | 0.040838257 |
| K01785 aldose 1-epimerase [EC:5.1.3.3]                                                | 11  | 11  | 11  | 9    | 5    | 7    | 0.025721421 | 0.035951532 |
| K00820 glucosamine--fructose-6-phosphate aminotransferase (isomerizing) [EC:2.6.1.16] | 11  | 15  | 10  | 6    | 7    | 5    | 0.021311641 | 0.034719627 |
| K1004110 Cell cycle                                                                   | 11  | 0   | 19  | 44   | 85   | 77   | 0.012835042 | 0.030523093 |
| K1005016 Huntington's disease                                                         | 11  | 4   | 26  | 42   | 61   | 57   | 0.010311896 | 0.030523093 |
| K1004612 Antigen processing and presentation                                          | 11  | 12  | 12  | 22   | 29   | 29   | 0.003125589 | 0.030523093 |

|                                                                                 |    |    |    |    |    |    |             |             |
|---------------------------------------------------------------------------------|----|----|----|----|----|----|-------------|-------------|
| K2000032 Development                                                            | 10 | 0  | 13 | 16 | 28 | 27 | 0.04365947  | 0.04752314  |
| K1004711 Circadian rhythm - fly                                                 | 10 | 0  | 15 | 22 | 32 | 32 | 0.021233063 | 0.034719627 |
| K1000510 N-Glycan biosynthesis                                                  | 10 | 14 | 14 | 19 | 24 | 25 | 0.011912539 | 0.030523093 |
| K1004115 p53 signaling pathway                                                  | 9  | 0  | 15 | 18 | 43 | 40 | 0.046400593 | 0.048606172 |
| K1005340 Primary immunodeficiency                                               | 9  | 8  | 5  | 11 | 16 | 12 | 0.043439495 | 0.047493848 |
| K01847 methylmalonyl-CoA mutase [EC:5.4.99.2]                                   | 9  | 8  | 3  | 12 | 13 | 12 | 0.039737619 | 0.04486632  |
| K1004320 Dorso-ventral axis formation                                           | 9  | 0  | 10 | 14 | 21 | 21 | 0.035284851 | 0.044020152 |
| K1004962 Vasopressin-regulated water reabsorption                               | 9  | 0  | 23 | 34 | 65 | 47 | 0.027497111 | 0.037579385 |
| K1000908 Zeatin biosynthesis                                                    | 9  | 12 | 8  | 14 | 17 | 14 | 0.026997302 | 0.037258448 |
| K00791 tRNA dimethylallyltransferase [EC:2.5.1.75]                              | 9  | 12 | 8  | 14 | 17 | 14 | 0.026997302 | 0.037258448 |
| K03601 exodeoxyribonuclease VII large subunit [EC:3.1.11.6]                     | 9  | 10 | 7  | 4  | 6  | 5  | 0.025386448 | 0.035951532 |
| K02218 casein kinase 1 [EC:2.7.11.1]                                            | 9  | 0  | 12 | 21 | 27 | 28 | 0.012174924 | 0.030523093 |
| K01206 alpha-L-fucosidase [EC:3.2.1.51]                                         | 9  | 9  | 10 | 2  | 3  | 6  | 0.010469669 | 0.030523093 |
| K01776 glutamate racemase [EC:5.1.1.3]                                          | 9  | 8  | 9  | 7  | 7  | 7  | 0.007490434 | 0.030523093 |
| K03572 DNA mismatch repair protein MutL                                         | 8  | 10 | 5  | 3  | 4  | 2  | 0.040545533 | 0.04523961  |
| K01687 dihydroxy-acid dehydratase [EC:4.2.1.9]                                  | 8  | 6  | 8  | 1  | 5  | 1  | 0.028460203 | 0.038257978 |
| K03110 fused signal recognition particle receptor                               | 8  | 9  | 6  | 3  | 5  | 2  | 0.025481481 | 0.035951532 |
| K1004020 Calcium signaling pathway                                              | 8  | 0  | 14 | 22 | 28 | 25 | 0.016044187 | 0.030523093 |
| K1004740 Olfactory transduction                                                 | 8  | 0  | 14 | 26 | 44 | 38 | 0.012645619 | 0.030523093 |
| K1005219 Bladder cancer                                                         | 7  | 0  | 7  | 10 | 13 | 12 | 0.048502075 | 0.049010782 |
| K01613 phosphatidylserine decarboxylase [EC:4.1.1.65]                           | 7  | 10 | 8  | 5  | 4  | 2  | 0.020092107 | 0.033853824 |
| K01126 glycerophosphoryl diester phosphodiesterase [EC:3.1.4.46]                | 6  | 5  | 3  | 2  | 2  | 2  | 0.039020527 | 0.04486632  |
| K1003050 Proteasome                                                             | 6  | 1  | 11 | 21 | 35 | 38 | 0.013313327 | 0.030523093 |
| K04041 fructose-1,6-bisphosphatase III [EC:3.1.3.11]                            | 5  | 3  | 7  | 10 | 12 | 8  | 0.037590112 | 0.04486632  |
| K1005110 Vibrio cholerae infection                                              | 5  | 0  | 6  | 13 | 35 | 32 | 0.032153283 | 0.04163004  |
| K01939 adenylosuccinate synthase [EC:6.3.4.4]                                   | 5  | 4  | 4  | 2  | 3  | 3  | 0.024110111 | 0.035951532 |
| K07891 Ras-related protein Rab-22                                               | 5  | 0  | 9  | 15 | 26 | 20 | 0.018904336 | 0.032520746 |
| K00928 aspartate kinase [EC:2.7.2.4]                                            | 5  | 5  | 6  | 4  | 4  | 4  | 0.01613009  | 0.030523093 |
| K01443 N-acetylglucosamine-6-phosphate deacetylase [EC:3.5.1.25]                | 5  | 5  | 3  | 1  | 2  | 1  | 0.015799848 | 0.030523093 |
| K01686 mannonate dehydratase [EC:4.2.1.8]                                       | 5  | 4  | 5  | 7  | 9  | 9  | 0.007933092 | 0.030523093 |
| K02112 F-type H+-transporting ATPase subunit beta [EC:3.6.3.14]                 | 5  | 2  | 3  | 10 | 9  | 9  | 0.003125589 | 0.030523093 |
| K06269 serine/threonine-protein phosphatase PP1 catalytic subunit [EC:3.1.3.16] | 4  | 0  | 7  | 8  | 17 | 14 | 0.048811551 | 0.049010782 |
| K00625 phosphate acetyltransferase [EC:2.3.1.8]                                 | 4  | 6  | 3  | 2  | 2  | 1  | 0.047420656 | 0.048606172 |
| K02945 small subunit ribosomal protein S1                                       | 4  | 6  | 2  | 7  | 10 | 8  | 0.040642089 | 0.04523961  |
| K00029 malate dehydrogenase (oxaloacetate-decarboxylating)(NADP+) [EC:1.1.1.40] | 4  | 4  | 1  | 0  | 0  | 0  | 0.039941968 | 0.04486632  |
| K02950 small subunit ribosomal protein S12                                      | 4  | 2  | 3  | 5  | 7  | 5  | 0.039020527 | 0.04486632  |
| K07897 Ras-related protein Rab-7A                                               | 4  | 0  | 5  | 7  | 10 | 10 | 0.030319669 | 0.040100207 |
| K01770 2-C-methyl-D-erythritol 2,4-cyclodiphosphate synthase [EC:4.6.1.12]      | 4  | 8  | 5  | 1  | 2  | 1  | 0.025481481 | 0.035951532 |
| K01881 prolyl-tRNA synthetase [EC:6.1.1.15]                                     | 4  | 4  | 3  | 5  | 5  | 6  | 0.024110111 | 0.035951532 |
| K04568 lysyl-tRNA synthetase, class II [EC:6.1.1.6]                             | 4  | 5  | 3  | 1  | 2  | 0  | 0.021311641 | 0.034719627 |

|                                                                                      |   |   |    |    |    |    |             |             |
|--------------------------------------------------------------------------------------|---|---|----|----|----|----|-------------|-------------|
| K01424 L-asparaginase [EC:3.5.1.1]                                                   | 4 | 6 | 5  | 3  | 2  | 2  | 0.01613009  | 0.030523093 |
| K01711 GDPmannose 4,6-dehydratase [EC:4.2.1.47]                                      | 4 | 3 | 2  | 6  | 8  | 8  | 0.007966202 | 0.030523093 |
| K02232 adenosylcobyrinic acid synthase [EC:6.3.5.10]                                 | 4 | 5 | 4  | 2  | 1  | 2  | 0.004812678 | 0.030523093 |
| K11839 ubiquitin carboxyl-terminal hydrolase 8 [EC:3.4.19.12]                        | 4 | 0 | 5  | 16 | 25 | 23 | 0.0042248   | 0.030523093 |
| K00793 riboflavin synthase [EC:2.5.1.9]                                              | 4 | 4 | 4  | 7  | 6  | 6  | 0.00219213  | 0.030523093 |
| K02495 oxygen-independent coproporphyrinogen III oxidase [EC:1.3.99.22]              | 3 | 6 | 2  | 7  | 8  | 7  | 0.042394467 | 0.046766991 |
| K00651 homoserine O-succinyltransferase [EC:2.3.1.46]                                | 3 | 2 | 5  | 6  | 10 | 8  | 0.032532525 | 0.04190053  |
| K03786 3-dehydroquininate dehydratase II [EC:4.2.1.10]                               | 3 | 2 | 1  | 4  | 5  | 4  | 0.024896163 | 0.035951532 |
| K01619 deoxyribose-phosphate aldolase [EC:4.1.2.4]                                   | 3 | 4 | 3  | 2  | 2  | 1  | 0.024110111 | 0.035951532 |
| K07904 Ras-related protein Rab-11A                                                   | 3 | 0 | 13 | 19 | 29 | 25 | 0.017730122 | 0.031836569 |
| K1004140 Regulation of autophagy                                                     | 3 | 0 | 12 | 20 | 37 | 33 | 0.016316452 | 0.03058205  |
| K05868 cyclin B                                                                      | 3 | 0 | 3  | 10 | 22 | 19 | 0.016010966 | 0.030523093 |
| K1004130 SNARE interactions in vesicular transport                                   | 3 | 0 | 7  | 12 | 19 | 15 | 0.013863227 | 0.030523093 |
| K1004710 Circadian rhythm                                                            | 3 | 0 | 4  | 9  | 16 | 12 | 0.0132356   | 0.030523093 |
| K10408 dynein heavy chain, axonemal                                                  | 3 | 0 | 11 | 19 | 22 | 25 | 0.009520176 | 0.030523093 |
| K12619 5'-3' exoribonuclease 2 [EC:3.1.13.-]                                         | 3 | 0 | 4  | 9  | 10 | 10 | 0.004181072 | 0.030523093 |
| K11253 histone H3                                                                    | 2 | 0 | 3  | 4  | 11 | 9  | 0.048742093 | 0.049010782 |
| K02227 adenosylcobinamide-phosphate synthase [EC:6.3.1.10]                           | 2 | 2 | 1  | 1  | 0  | 0  | 0.047420656 | 0.048606172 |
| K10117 raffinose/stachyose/melibiose transport system substrate-binding protein      | 2 | 2 | 1  | 0  | 1  | 0  | 0.047420656 | 0.048606172 |
| K00074 3-hydroxybutyryl-CoA dehydrogenase [EC:1.1.1.157]                             | 2 | 1 | 2  | 0  | 1  | 0  | 0.047420656 | 0.048606172 |
| K07466 replication factor A1                                                         | 2 | 0 | 2  | 3  | 4  | 5  | 0.039020527 | 0.04486632  |
| K03120 transcription initiation factor TFIID TATA-box-binding protein                | 2 | 0 | 4  | 7  | 6  | 5  | 0.036277825 | 0.044399726 |
| K03259 translation initiation factor 4E                                              | 2 | 0 | 3  | 5  | 13 | 11 | 0.035371373 | 0.044020152 |
| K02156 aubergine                                                                     | 2 | 0 | 3  | 5  | 11 | 11 | 0.028437314 | 0.038257978 |
| K1003022 Basal transcription factors                                                 | 2 | 0 | 5  | 10 | 10 | 7  | 0.019441768 | 0.032983965 |
| K1005322 Systemic lupus erythematosus                                                | 2 | 0 | 4  | 7  | 13 | 10 | 0.018411099 | 0.032350931 |
| K08957 casein kinase 1, alpha [EC:2.7.11.1]                                          | 2 | 0 | 3  | 7  | 15 | 13 | 0.017457615 | 0.0317713   |
| K01575 acetolactate decarboxylase [EC:4.1.1.5]                                       | 2 | 1 | 1  | 0  | 0  | 0  | 0.01613009  | 0.030523093 |
| K03230 type III secretion protein V                                                  | 2 | 1 | 1  | 0  | 0  | 0  | 0.01613009  | 0.030523093 |
| K02063 thiamine transport system permease protein                                    | 2 | 1 | 1  | 0  | 0  | 0  | 0.01613009  | 0.030523093 |
| K07151 dolichyl-diphosphooligosaccharide--protein glycosyltransferase [EC:2.4.99.18] | 2 | 2 | 2  | 0  | 1  | 1  | 0.01613009  | 0.030523093 |
| K1005410 Hypertrophic cardiomyopathy (HCM)                                           | 2 | 0 | 6  | 10 | 12 | 10 | 0.0132356   | 0.030523093 |
| K11927 ATP-dependent RNA helicase RhIE [EC:3.6.4.13]                                 | 2 | 2 | 1  | 0  | 0  | 0  | 0.007490434 | 0.030523093 |
| K01629 rhamnulose-1-phosphate aldolase [EC:4.1.2.19]                                 | 2 | 2 | 1  | 0  | 0  | 0  | 0.007490434 | 0.030523093 |
| K06631 polo-like kinase 1 [EC:2.7.11.21]                                             | 2 | 0 | 3  | 7  | 9  | 8  | 0.003862848 | 0.030523093 |
| K00147 glutamate-5-semialdehyde dehydrogenase [EC:1.2.1.41]                          | 2 | 4 | 2  | 7  | 8  | 7  | 0.00331976  | 0.030523093 |
| K00657 diamine N-acetyltransferase [EC:2.3.1.57]                                     | 2 | 1 | 1  | 5  | 6  | 6  | 0.000777907 | 0.030523093 |
| K13043 N-succinyl-L-ornithine transcarbamylase [EC:2.1.3.11]                         | 1 | 1 | 3  | 5  | 3  | 5  | 0.047420656 | 0.048606172 |
| K06674 structural maintenance of chromosome 2                                        | 1 | 1 | 2  | 3  | 3  | 2  | 0.047420656 | 0.048606172 |
| K07198 5'-AMP-activated protein kinase, catalytic alpha subunit [EC:2.7.11.11]       | 1 | 0 | 5  | 6  | 7  | 8  | 0.037590112 | 0.04486632  |

|                                                                                              |   |   |   |    |    |    |             |             |
|----------------------------------------------------------------------------------------------|---|---|---|----|----|----|-------------|-------------|
| K12581 CCR4-NOT transcription complex subunit 7/8                                            | 1 | 0 | 4 | 6  | 16 | 12 | 0.037148147 | 0.044796295 |
| K07359 calcium/calmodulin-dependent protein kinase kinase [EC:2.7.11.17]                     | 1 | 0 | 2 | 3  | 7  | 5  | 0.036277825 | 0.044399726 |
| K12492 ADP-ribosylation factor GTPase-activating protein 1                                   | 1 | 0 | 2 | 6  | 4  | 3  | 0.034109423 | 0.043476259 |
| K03006 DNA-directed RNA polymerase II subunit RPB1 [EC:2.7.7.6]                              | 1 | 0 | 2 | 3  | 6  | 4  | 0.034109423 | 0.043476259 |
| K1005130 Pathogenic Escherichia coli infection                                               | 1 | 0 | 2 | 3  | 7  | 6  | 0.031375734 | 0.040838257 |
| K1005217 Basal cell carcinoma                                                                | 1 | 0 | 6 | 8  | 11 | 9  | 0.027110822 | 0.037258448 |
| K04802 proliferating cell nuclear antigen                                                    | 1 | 0 | 0 | 2  | 5  | 5  | 0.025386448 | 0.035951532 |
| K02206 cyclin-dependent kinase 2 [EC:2.7.11.22]                                              | 1 | 0 | 2 | 3  | 6  | 5  | 0.025386448 | 0.035951532 |
| K01373 cathepsin F [EC:3.4.22.41]                                                            | 1 | 0 | 2 | 3  | 4  | 5  | 0.021311641 | 0.034719627 |
| K07889 Ras-related protein Rab-5C                                                            | 1 | 0 | 2 | 7  | 14 | 8  | 0.018562565 | 0.032385752 |
| K03347 cullin 1                                                                              | 1 | 0 | 1 | 2  | 2  | 2  | 0.01613009  | 0.030523093 |
| K13829 shikimate kinase / 3-dehydroquinate synthase [EC:2.7.1.71 4.2.3.4]                    | 1 | 1 | 1 | 2  | 2  | 3  | 0.01613009  | 0.030523093 |
| K00068 sorbitol-6-phosphate 2-dehydrogenase [EC:1.1.1.140]                                   | 1 | 2 | 1 | 0  | 0  | 0  | 0.01613009  | 0.030523093 |
| K08515 vesicle-associated membrane protein 7                                                 | 1 | 0 | 1 | 3  | 6  | 5  | 0.0132356   | 0.030523093 |
| K12194 charged multivesicular body protein 4                                                 | 1 | 0 | 1 | 2  | 3  | 3  | 0.0132356   | 0.030523093 |
| K01195 beta-glucuronidase [EC:3.2.1.31]                                                      | 1 | 2 | 2 | 3  | 4  | 4  | 0.0132356   | 0.030523093 |
| K1000944 Flavone and flavonol biosynthesis                                                   | 1 | 2 | 2 | 3  | 4  | 4  | 0.0132356   | 0.030523093 |
| K01369 legumain [EC:3.4.22.34]                                                               | 1 | 0 | 1 | 2  | 3  | 3  | 0.0132356   | 0.030523093 |
| K00053 ketol-acid reductoisomerase [EC:1.1.1.86]                                             | 1 | 1 | 0 | 7  | 8  | 4  | 0.010469669 | 0.030523093 |
| K02109 F-type H <sup>+</sup> -transporting ATPase subunit b                                  | 1 | 3 | 1 | 5  | 6  | 5  | 0.007933092 | 0.030523093 |
| K06630 14-3-3 protein epsilon                                                                | 1 | 0 | 2 | 4  | 4  | 5  | 0.007490434 | 0.030523093 |
| K03283 heat shock 70kDa protein 1/8                                                          | 1 | 0 | 3 | 6  | 9  | 8  | 0.007090812 | 0.030523093 |
| K06689 ubiquitin-conjugating enzyme E2 D/E [EC:6.3.2.19]                                     | 1 | 0 | 7 | 14 | 20 | 17 | 0.006793715 | 0.030523093 |
| K07258 D-alanyl-D-alanine carboxypeptidase (penicillin-binding protein 5/6) [EC:3.4.16.4]    | 1 | 1 | 1 | 3  | 5  | 4  | 0.006533376 | 0.030523093 |
| K07827 GTPase KRas                                                                           | 1 | 0 | 2 | 4  | 5  | 5  | 0.005328128 | 0.030523093 |
| K02183 calmodulin                                                                            | 1 | 0 | 3 | 15 | 12 | 14 | 0.000586891 | 0.030523093 |
| K06109 Ras-related protein Rab-13                                                            | 1 | 0 | 1 | 10 | 9  | 11 | 0.000151011 | 0.02485092  |
| K02389 flagellar basal-body rod modification protein FlgD                                    | 0 | 1 | 0 | 1  | 2  | 2  | 0.047420656 | 0.048606172 |
| K10756 replication factor C subunit 3/5                                                      | 0 | 0 | 1 | 1  | 2  | 2  | 0.047420656 | 0.048606172 |
| K02727 20S proteasome subunit alpha 7 [EC:3.4.25.1]                                          | 0 | 0 | 1 | 1  | 2  | 2  | 0.047420656 | 0.048606172 |
| K10839 UV excision repair protein RAD23                                                      | 0 | 0 | 1 | 1  | 2  | 2  | 0.047420656 | 0.048606172 |
| K01920 glutathione synthase [EC:6.3.2.3]                                                     | 0 | 0 | 0 | 1  | 4  | 4  | 0.039941968 | 0.04486632  |
| K12196 vacuolar protein-sorting-associated protein 4                                         | 0 | 0 | 0 | 2  | 5  | 2  | 0.039941968 | 0.04486632  |
| K08959 casein kinase 1, delta [EC:2.7.11.1]                                                  | 0 | 0 | 0 | 1  | 4  | 4  | 0.039941968 | 0.04486632  |
| K02901 large subunit ribosomal protein L27e                                                  | 0 | 0 | 0 | 1  | 4  | 4  | 0.039941968 | 0.04486632  |
| K02434 aspartyl-tRNA(Asn)/glutamyl-tRNA(Gln) amidotransferase subunit B [EC:6.3.5.6 6.3.5.7] | 0 | 0 | 0 | 1  | 4  | 3  | 0.039020527 | 0.04486632  |
| K12575 kinetochore protein SLK19                                                             | 0 | 0 | 0 | 1  | 3  | 4  | 0.039020527 | 0.04486632  |
| K08341 GABA(A) receptor-associated protein                                                   | 0 | 0 | 1 | 2  | 4  | 2  | 0.035168453 | 0.044020152 |
| K01878 glycyl-tRNA synthetase alpha chain [EC:6.1.1.14]                                      | 0 | 0 | 0 | 2  | 3  | 1  | 0.025721421 | 0.035951532 |
| K01634 sphinganine-1-phosphate aldolase [EC:4.1.2.27]                                        | 0 | 0 | 0 | 1  | 2  | 3  | 0.025721421 | 0.035951532 |

|                                                                               |   |   |   |   |   |   |             |             |
|-------------------------------------------------------------------------------|---|---|---|---|---|---|-------------|-------------|
| K03013 DNA-directed RNA polymerases I, II, and III subunit RPABC1             | 0 | 0 | 0 | 1 | 3 | 2 | 0.025721421 | 0.035951532 |
| K03063 26S proteasome regulatory subunit T3                                   | 0 | 0 | 0 | 1 | 3 | 2 | 0.025721421 | 0.035951532 |
| K02542 DNA replication licensing factor MCM6 [EC:3.6.4.12]                    | 0 | 0 | 0 | 1 | 2 | 3 | 0.025721421 | 0.035951532 |
| K12670 oligosaccharyltransferase complex subunit beta                         | 0 | 0 | 0 | 2 | 1 | 3 | 0.025721421 | 0.035951532 |
| K07888 Ras-related protein Rab-5B                                             | 0 | 0 | 0 | 1 | 2 | 3 | 0.025721421 | 0.035951532 |
| K1004622 RIG-I-like receptor signaling pathway                                | 0 | 0 | 1 | 3 | 7 | 4 | 0.025481481 | 0.035951532 |
| K12879 THO complex subunit 2                                                  | 0 | 0 | 0 | 1 | 3 | 3 | 0.024896163 | 0.035951532 |
| K10643 CCR4-NOT transcription complex subunit 4 [EC:6.3.2.19]                 | 0 | 0 | 0 | 2 | 6 | 6 | 0.024896163 | 0.035951532 |
| K02728 20S proteasome subunit alpha 3 [EC:3.4.25.1]                           | 0 | 0 | 0 | 1 | 3 | 3 | 0.024896163 | 0.035951532 |
| K02885 large subunit ribosomal protein L19e                                   | 0 | 0 | 0 | 1 | 3 | 3 | 0.024896163 | 0.035951532 |
| K01962 acetyl-CoA carboxylase carboxyl transferase subunit alpha [EC:6.4.1.2] | 0 | 0 | 0 | 1 | 3 | 3 | 0.024896163 | 0.035951532 |
| K08991 crossover junction endonuclease MUS81 [EC:3.1.22.-]                    | 0 | 0 | 2 | 3 | 5 | 4 | 0.019441768 | 0.032983965 |
| K03260 translation initiation factor 4G                                       | 0 | 1 | 0 | 2 | 4 | 3 | 0.01613009  | 0.030523093 |
| K04710 ceramide synthetase [EC:2.3.1.24]                                      | 0 | 0 | 0 | 1 | 1 | 2 | 0.01613009  | 0.030523093 |
| K03064 26S proteasome regulatory subunit T4                                   | 0 | 0 | 0 | 1 | 2 | 1 | 0.01613009  | 0.030523093 |
| K08734 DNA mismatch repair protein MLH1                                       | 0 | 0 | 0 | 1 | 1 | 2 | 0.01613009  | 0.030523093 |
| K02936 large subunit ribosomal protein L7Ae                                   | 0 | 0 | 0 | 1 | 1 | 2 | 0.01613009  | 0.030523093 |
| K12666 oligosaccharyltransferase complex subunit alpha (ribophorin I)         | 0 | 0 | 0 | 2 | 5 | 5 | 0.01613009  | 0.030523093 |
| K03037 26S proteasome regulatory subunit N7                                   | 0 | 0 | 0 | 1 | 2 | 1 | 0.01613009  | 0.030523093 |
| K12857 Prp8 binding protein                                                   | 0 | 0 | 0 | 2 | 1 | 1 | 0.01613009  | 0.030523093 |
| K02145 V-type H <sup>+</sup> -transporting ATPase subunit A [EC:3.6.3.14]     | 0 | 0 | 0 | 1 | 1 | 2 | 0.01613009  | 0.030523093 |
| K08506 syntaxin of plants SYP7                                                | 0 | 0 | 0 | 1 | 1 | 2 | 0.01613009  | 0.030523093 |
| K12251 N-carbamoylputrescine amidase [EC:3.5.1.53]                            | 0 | 1 | 0 | 4 | 3 | 2 | 0.01613009  | 0.030523093 |
| K12195 charged multivesicular body protein 6                                  | 0 | 0 | 0 | 1 | 2 | 1 | 0.01613009  | 0.030523093 |
| K02900 large subunit ribosomal protein L27Ae                                  | 0 | 0 | 0 | 1 | 1 | 2 | 0.01613009  | 0.030523093 |
| K02947 small subunit ribosomal protein S10e                                   | 0 | 0 | 0 | 1 | 1 | 2 | 0.01613009  | 0.030523093 |
| K05755 actin related protein 2/3 complex, subunit 4                           | 0 | 0 | 0 | 1 | 1 | 2 | 0.01613009  | 0.030523093 |
| K05692 actin beta/gamma 1                                                     | 0 | 0 | 0 | 1 | 2 | 1 | 0.01613009  | 0.030523093 |
| K1005412 Arrhythmogenic right ventricular cardiomyopathy (ARVC)               | 0 | 0 | 0 | 1 | 2 | 1 | 0.01613009  | 0.030523093 |
| K02932 large subunit ribosomal protein L5e                                    | 0 | 0 | 0 | 1 | 1 | 2 | 0.01613009  | 0.030523093 |
| K08333 phosphoinositide-3-kinase, regulatory subunit 4 [EC:2.7.11.1]          | 0 | 0 | 0 | 1 | 2 | 1 | 0.01613009  | 0.030523093 |
| K12275 translocation protein SEC62                                            | 0 | 0 | 0 | 1 | 1 | 2 | 0.01613009  | 0.030523093 |
| K12837 splicing factor U2AF 65 kDa subunit                                    | 0 | 0 | 0 | 1 | 1 | 2 | 0.01613009  | 0.030523093 |
| K02940 large subunit ribosomal protein L9e                                    | 0 | 0 | 0 | 1 | 1 | 2 | 0.01613009  | 0.030523093 |
| K01108 phosphatidylinositol-3-phosphatase [EC:3.1.3.64]                       | 0 | 0 | 0 | 1 | 2 | 1 | 0.01613009  | 0.030523093 |
| K01078 acid phosphatase [EC:3.1.3.2]                                          | 0 | 0 | 0 | 2 | 5 | 4 | 0.014172595 | 0.030523093 |
| K10901 bloom syndrome protein [EC:3.6.4.12]                                   | 0 | 0 | 1 | 6 | 3 | 4 | 0.0132356   | 0.030523093 |
| K06228 fused [EC:2.7.11.1]                                                    | 0 | 0 | 3 | 7 | 6 | 5 | 0.012348477 | 0.030523093 |
| K03094 S-phase kinase-associated protein 1                                    | 0 | 0 | 1 | 3 | 5 | 3 | 0.011056493 | 0.030523093 |
| K01363 cathepsin B [EC:3.4.22.1]                                              | 0 | 0 | 1 | 3 | 6 | 5 | 0.01005971  | 0.030523093 |

|                                                                                  |   |   |   |    |    |    |             |             |
|----------------------------------------------------------------------------------|---|---|---|----|----|----|-------------|-------------|
| K00888 phosphatidylinositol 4-kinase [EC:2.7.1.67]                               | 0 | 0 | 0 | 3  | 6  | 4  | 0.007966202 | 0.030523093 |
| K08486 syntaxin 1B/2/3                                                           | 0 | 0 | 1 | 2  | 3  | 3  | 0.007762603 | 0.030523093 |
| K1004614 Renin-angiotensin system                                                | 0 | 1 | 0 | 3  | 2  | 3  | 0.007762603 | 0.030523093 |
| K00921 1-phosphatidylinositol-3-phosphate 5-kinase [EC:2.7.1.150]                | 0 | 0 | 1 | 2  | 3  | 3  | 0.007762603 | 0.030523093 |
| K12830 splicing factor 3B subunit 3                                              | 0 | 0 | 0 | 1  | 2  | 2  | 0.007490434 | 0.030523093 |
| K02958 small subunit ribosomal protein S15e                                      | 0 | 0 | 0 | 1  | 2  | 2  | 0.007490434 | 0.030523093 |
| K09540 translocation protein SEC63                                               | 0 | 0 | 1 | 2  | 2  | 2  | 0.007490434 | 0.030523093 |
| K02729 20S proteasome subunit alpha 5 [EC:3.4.25.1]                              | 0 | 0 | 0 | 1  | 2  | 2  | 0.007490434 | 0.030523093 |
| K00694 cellulose synthase (UDP-forming) [EC:2.4.1.12]                            | 0 | 0 | 0 | 1  | 2  | 2  | 0.007490434 | 0.030523093 |
| K08281 nicotinamidase/pyrazinamidase [EC:3.5.1.19 3.5.1.-]                       | 0 | 0 | 0 | 1  | 2  | 2  | 0.007490434 | 0.030523093 |
| K03124 transcription initiation factor TFIIB                                     | 0 | 0 | 0 | 1  | 2  | 2  | 0.007490434 | 0.030523093 |
| K07203 FKBP12-rapamycin complex-associated protein                               | 0 | 0 | 0 | 4  | 4  | 2  | 0.007490434 | 0.030523093 |
| K10949 ER lumen protein retaining receptor                                       | 0 | 0 | 0 | 2  | 1  | 2  | 0.007490434 | 0.030523093 |
| K12184 ESCRT-I complex subunit VPS28                                             | 0 | 0 | 0 | 1  | 2  | 2  | 0.007490434 | 0.030523093 |
| K12614 ATP-dependent RNA helicase DDX6/DHH1 [EC:3.6.4.13]                        | 0 | 0 | 0 | 1  | 2  | 2  | 0.007490434 | 0.030523093 |
| K02898 large subunit ribosomal protein L26e                                      | 0 | 0 | 0 | 1  | 2  | 2  | 0.007490434 | 0.030523093 |
| K11481 aurora kinase A [EC:2.7.11.1]                                             | 0 | 0 | 0 | 1  | 2  | 2  | 0.007490434 | 0.030523093 |
| K01839 phosphopentomutase [EC:5.4.2.7]                                           | 0 | 0 | 0 | 1  | 2  | 2  | 0.007490434 | 0.030523093 |
| K06210 nicotinamide mononucleotide adenylyltransferase [EC:2.7.7.1 2.7.7.18]     | 0 | 0 | 0 | 2  | 1  | 2  | 0.007490434 | 0.030523093 |
| K02955 small subunit ribosomal protein S14e                                      | 0 | 0 | 0 | 1  | 2  | 2  | 0.007490434 | 0.030523093 |
| K04532 amyloid beta precursor protein binding protein 1                          | 0 | 0 | 0 | 1  | 2  | 2  | 0.007490434 | 0.030523093 |
| K03036 26S proteasome regulatory subunit N6                                      | 0 | 0 | 0 | 1  | 2  | 2  | 0.007490434 | 0.030523093 |
| K10573 ubiquitin-conjugating enzyme E2 A [EC:6.3.2.19]                           | 0 | 0 | 0 | 2  | 2  | 1  | 0.007490434 | 0.030523093 |
| K11423 histone-lysine N-methyltransferase SETD2 [EC:2.1.1.43]                    | 0 | 0 | 0 | 2  | 1  | 2  | 0.007490434 | 0.030523093 |
| K10546 putative multiple sugar transport system substrate-binding protein        | 0 | 0 | 0 | 1  | 2  | 2  | 0.007490434 | 0.030523093 |
| K01254 leukotriene-A4 hydrolase [EC:3.3.2.6]                                     | 0 | 0 | 0 | 1  | 2  | 2  | 0.007490434 | 0.030523093 |
| K05759 profilin                                                                  | 0 | 0 | 0 | 1  | 2  | 2  | 0.007490434 | 0.030523093 |
| K01120 3',5'-cyclic-nucleotide phosphodiesterase [EC:3.1.4.17]                   | 0 | 0 | 0 | 2  | 4  | 3  | 0.006533376 | 0.030523093 |
| K06675 structural maintenance of chromosome 4                                    | 0 | 0 | 0 | 2  | 3  | 4  | 0.006533376 | 0.030523093 |
| K1005416 Viral myocarditis                                                       | 0 | 1 | 1 | 6  | 7  | 4  | 0.006073612 | 0.030523093 |
| K08269 serine/threonine-protein kinase ULK/ATG1 [EC:2.7.11.1]                    | 0 | 0 | 4 | 10 | 14 | 12 | 0.003772017 | 0.030523093 |
| K02155 V-type H <sup>+</sup> -transporting ATPase 16kDa proteolipid subunit      | 0 | 0 | 0 | 3  | 4  | 5  | 0.002278426 | 0.030523093 |
| K10742 DNA replication ATP-dependent helicase Dna2 [EC:3.6.4.12]                 | 0 | 0 | 0 | 2  | 2  | 3  | 0.00219213  | 0.030523093 |
| K03407 two-component system, chemotaxis family, sensor kinase CheA [EC:2.7.13.3] | 0 | 0 | 0 | 2  | 3  | 2  | 0.00219213  | 0.030523093 |
| K13289 cathepsin A (carboxypeptidase C) [EC:3.4.16.5]                            | 0 | 0 | 0 | 3  | 2  | 2  | 0.00219213  | 0.030523093 |
| K10798 poly [ADP-ribose] polymerase [EC:2.4.2.30]                                | 0 | 0 | 0 | 3  | 2  | 2  | 0.00219213  | 0.030523093 |
| K04460 serine/threonine-protein phosphatase 5 [EC:3.1.3.16]                      | 0 | 0 | 0 | 2  | 3  | 3  | 0.001323897 | 0.030523093 |
| K12603 CCR4-NOT transcription complex subunit 6 [EC:3.1.13.4]                    | 0 | 0 | 0 | 4  | 4  | 5  | 0.00020204  | 0.02485092  |
